# Supplementary material for: Indigenous Knowledge, Livelihoods and Government Policy
Source: Hindawi journal article supplement (doi:10.1155/2012/286079), 2011-01-01
Supplement: f1 [file 286079.f1.pdf]

## SUPPLEMENTARY DATA

### INITIAL

constant BW = 70.           ! Body weight (kg)  
constant conc = 0           ! Exposition dose (ppm)  
constant MW = 0           ! Molecular weight  
constant SV = 24.450       ! Standard volume mL/mol  
constant DUREE= 0       ! Exposure lenght (h)  
constant periode = 0       ! Period between two exposures (h)

### ! Tissue volumes (fraction of body weight)

constant VLc = 0.026       ! Liver (fraction of body weight)  
constant VRc = 0.05       ! Richly perfused tissues (fraction of body weight)  
constant VSc = 0.62       ! Poorly perfused tissues (fraction of body weight)  
constant VFc = 0.19       ! Fat (fraction of body weight)

VL = VLc\*BW           ! Liver (L)  
VR = VRc\*BW           ! Richly perfused tissues (L)  
VS = VSc\*BW           ! Poorly perfused tissues (L)  
VF = VFc\*BW           ! Fat (L)

## **! Flows**

constant  $QP_c = 18$  ! Alveolar ventilation (L/h/kg)

constant  $QC_c = 18$  ! Cardiac output (L/h/kg)

$QP = QP_c \cdot BW^{0.74}$  ! Alveolar ventilation (L/h)

$QC = QC_c \cdot BW^{0.74}$  ! Cardiac output (L/h)

constant  $QL_c = 0.26$  ! Liver (fraction of QC)

constant  $QR_c = 0.44$  ! Richly perfused tissues (fraction of QC)

constant  $QSc = 0.25$  ! Poorly perfused tissues (fraction of QC)

constant  $QFc = 0.05$  ! fat (%QC)

$QL = QL_c \cdot QC$  ! Liver (L/h)

$QR = QR_c \cdot QC$  ! Richly perfused tissues (L/h)

$QS = QSc \cdot QC$  ! Poorly perfused tissues (L/h)

$QF = QFc \cdot QC$  ! fat (L/h)

## **! Partition coefficients (PCs)**

constant  $PB = 0.0$  ! Blood:air

constant  $PLB = 0.0$  ! Liver:blood

constant PRB = 0.0 ! RPT:blood

constant PSB = 0.0 ! PPT:blood

constant PFB = 0.0 ! Fat:blood

### **! Metabolism constants**

constant logclint = 0.0 ! log CLint (L PL/h/kg)

CLintPL = 10\*\*logclint ! CLint L PL/h/kg

constant pplb = 0.0 ! Phospholipids:blood PC

CLint = CLintPL \* pplb \* BW\*\*0.75 ! CLint ( L bloob/h)

constant KFC = 0.0 ! First order metabolism (h-kg)-1

KF = KFC \* BW\*\*0.3 ! First order metabolism (h-1)

! Hepatic clearance based on CLint and Kf

CLH = QL \* (CLINT + KF \* VL)/(QL + CLINT + KF \* VL)

! Hepatic clearance based extraction ratio (E)

constant E = 0.0 ! Extraction ratio

! CLH = QL \* E

**END ! INITIAL**

## **DYNAMIC**

### **! Exposure scenario**

JOURNE=PULSE(0.,periode,DUREE) ! 24 h exposure

CI=JOURNE\*conc \*MW / SV /1000 ! Inhaled concentration (mg/L)

### **! Blood concentrations**

CA = (CI\*QP+QC\*CV)/(QC+QP/PB) ! Arterial mg/L

CV = (QL\*CVL+QR\*CVR+QS\*CVS+QF\*CVF)/QC ! Venous mg/L

AUC = INTEG(CV, 0.0) ! Venous blood area under the curve (mg/L-h)

CALV = CA/PB\*SV/MW\*1000 ! Alveolar air PPM

### **! Tissue compartments**

#### **! Liver**

rAL = QL\*(CA-CVL) - CLH \* CA ! Rate of amount (mg/h)

AL = integ (rAL,0.0) ! Amount (mg)

CL = AL/VL ! Liver concentration (mg/L)

CVL = CL/PLB ! Liver venous blood concentration (mg/L)

### **! Richly perfused tissues**

$rAR = QR*(CA-CVR)$  ! Rate of amount (mg/h)

$AR = \text{integ}(rAR, 0.0)$  ! Amount (mg)

$CR = AR/VR$  ! Richly perfused tissues concentration (mg/L)

$CVR = CR/PRB$  ! Richly perfused tissues venous blood concentration (mg/L)

### **! Slowly perfused tissues**

$rAS = QS*(CA-CVS)$  ! Rate of amount (mg/h)

$AS = \text{integ}(rAS, 0.0)$  ! Amount (mg)

$CS = AS/VS$  ! Poorly perfused tissues concentration (mg/L)

$CVS = CS/PSB$  ! Poorly perfused tissues venous blood concentration (mg/L)

### **! Fat**

$rAF = QF*(CA-CVF)$  ! Rate of amount (mg/h)

$AF = \text{integ}(rAF, 0.0)$  ! Amount (mg)

$CF = AF/VF$  ! Fat concentration (mg/L)

$CVF = CF/PFB$  ! Fat venous blood concentration (mg/L)

END ! DYNAMIC
